# Supplementary material for: Trends in Mortality Related to Sepsis and Diabetes Mellitus in the United States: A 1999–2020 analysis
Source: Research Square preprint supplement (doi:10.21203/rs.3.rs-6448351/v1), 2025-05-16
Supplement: Supplementary file 1 [file bf851ee17bb0dc76407e0cca.docx]

**Supplemental Table 1.** Absolute number of sepsis and DM-related deaths stratified by sex and race in the United States, 1999-2020.

| **Year** | **Overall** | **Females** | **Males** | **White** | **Black or African American** | | **Asian or Pacific Islander** | **American Indian or Alaskan Native** | **Hispanic or Latino** |
| --- | --- | --- | --- | --- | --- | --- | --- | --- | --- |
| 1999 | 15670 | 8958 | 6712 | 11642 | | 3534 | 330 | 164 | 1397 |
| 2000 | 15601 | 8855 | 6746 | 11560 | | 3563 | 334 | 144 | 1492 |
| 2001 | 16194 | 9153 | 7041 | 12076 | | 3622 | 351 | 145 | 1656 |
| 2002 | 16679 | 9354 | 7325 | 12410 | | 3699 | 403 | 167 | 1671 |
| 2003 | 17131 | 9513 | 7618 | 12818 | | 3674 | 467 | 172 | 1786 |
| 2004 | 17248 | 9426 | 7822 | 12883 | | 3727 | 446 | 192 | 1817 |
| 2005 | 18236 | 9879 | 8357 | 13531 | | 4001 | 525 | 179 | 2013 |
| 2006 | 17511 | 9468 | 8043 | 13086 | | 3701 | 535 | 189 | 1963 |
| 2007 | 17283 | 9136 | 8147 | 12884 | | 3714 | 497 | 188 | 2020 |
| 2008 | 17082 | 9062 | 8020 | 12880 | | 3475 | 541 | 186 | 1924 |
| 2009 | 16467 | 8562 | 7905 | 12484 | | 3232 | 556 | 195 | 1927 |
| 2010 | 16591 | 8646 | 7945 | 12611 | | 3239 | 543 | 198 | 2013 |
| 2011 | 16960 | 8863 | 8097 | 12928 | | 3231 | 570 | 231 | 2139 |
| 2012 | 16509 | 8504 | 8005 | 12703 | | 3011 | 559 | 236 | 2035 |
| 2013 | 17045 | 8738 | 8307 | 13142 | | 3044 | 620 | 239 | 2208 |
| 2014 | 17375 | 8650 | 8725 | 13470 | | 3034 | 640 | 231 | 2284 |
| 2015 | 18527 | 9251 | 9276 | 14439 | | 3144 | 692 | 252 | 2405 |
| 2016 | 19390 | 9384 | 10006 | 15096 | | 3350 | 689 | 255 | 2576 |
| 2017 | 19867 | 9557 | 10310 | 15555 | | 3184 | 851 | 277 | 2744 |
| 2018 | 20217 | 9578 | 10639 | 15674 | | 3446 | 801 | 296 | 2683 |
| 2019 | 20257 | 9513 | 10744 | 15767 | | 3352 | 850 | 288 | 2754 |
| 2020 | 28663 | 13132 | 15531 | 21858 | | 5081 | 1299 | 425 | 5056 |
| Total | 396503 | 205182 | 191321 | 301497 | | 77058 | 13099 | 4849 | 48563 |

**Supplemental Table 2.** Overall and sex-stratified sepsis and DM-related age-adjusted mortality rates per 100,000 among adults in the United States, 1999 to 2020.

| **Year** | **Overall** | **Male** | **Female** |
| --- | --- | --- | --- |
| 1999 | 8.88 | 9.24 | 8.64 |
| 2000 | 8.73 | 9.19 | 8.45 |
| 2001 | 8.9 | 9.34 | 8.65 |
| 2002 | 8.99 | 9.53 | 8.71 |
| 2003 | 9.09 | 9.67 | 8.75 |
| 2004 | 9.02 | 9.77 | 8.52 |
| 2005 | 9.35 | 10.15 | 8.81 |
| 2006 | 8.81 | 9.56 | 8.31 |
| 2007 | 8.53 | 9.47 | 7.88 |
| 2008 | 8.27 | 9.11 | 7.68 |
| 2009 | 7.86 | 8.76 | 7.14 |
| 2010 | 7.76 | 8.66 | 7.12 |
| 2011 | 7.72 | 8.51 | 7.14 |
| 2012 | 7.3 | 8.22 | 6.67 |
| 2013 | 7.43 | 8.29 | 6.75 |
| 2014 | 7.35 | 8.42 | 6.55 |
| 2015 | 7.67 | 8.77 | 6.84 |
| 2016 | 7.88 | 9.28 | 6.82 |
| 2017 | 7.82 | 9.25 | 6.77 |
| 2018 | 7.85 | 9.38 | 6.68 |
| 2019 | 7.7 | 9.22 | 6.5 |
| 2020 | 10.68 | 12.96 | 8.88 |
| Total | 8.3 | 9.3 | 7.58 |

**Supplemental Table 3.** Sepsis and DM-related age-adjusted mortality rates per 100,000 among adults stratified by race/ethnicity in the United States, 1999 to 2020.

| **Year** | **White** | **Black or African American** | **Asian or Pacific Islander** | **American Indian or Alaskan Native** | **Hispanic or Latino** |
| --- | --- | --- | --- | --- | --- |
| 1999 | 7.43 | 22.73 | 8.13 | 18.10 | 15.25 |
| 2000 | 7.31 | 22.79 | 7.62 | 14.85 | 15.77 |
| 2001 | 7.53 | 22.5 | 7.63 | 14.25 | 16.47 |
| 2002 | 7.62 | 22.68 | 7.9 | 15.52 | 15.7 |
| 2003 | 7.78 | 21.98 | 8.78 | 14.38 | 15.63 |
| 2004 | 7.71 | 21.91 | 8.02 | 15.48 | 15.34 |
| 2005 | 7.98 | 22.79 | 8.72 | 13.69 | 16.04 |
| 2006 | 7.58 | 20.45 | 8.43 | 14.06 | 14.84 |
| 2007 | 7.36 | 20.19 | 7.59 | 13.44 | 14.77 |
| 2008 | 7.2 | 18.34 | 7.83 | 13.34 | 13.07 |
| 2009 | 6.89 | 16.5 | 7.55 | 13.13 | 12.64 |
| 2010 | 6.85 | 16.26 | 7.05 | 11.88 | 12.71 |
| 2011 | 6.86 | 15.72 | 6.75 | 14.11 | 12.43 |
| 2012 | 6.56 | 14.03 | 6.3 | 13.27 | 11.25 |
| 2013 | 6.69 | 13.73 | 6.58 | 12.36 | 11.65 |
| 2014 | 6.69 | 13.1 | 6.38 | 11.66 | 11.3 |
| 2015 | 7.06 | 13.14 | 6.41 | 12.56 | 11.27 |
| 2016 | 7.26 | 13.57 | 5.99 | 11.82 | 11.51 |
| 2017 | 7.26 | 12.41 | 7.05 | 12.35 | 11.71 |
| 2018 | 7.28 | 13.06 | 6.21 | 12.44 | 10.99 |
| 2019 | 7.13 | 12.4 | 6.35 | 11.94 | 10.75 |
| 2020 | 9.78 | 18.1 | 9.15 | 16.11 | 18.5 |
| Total | 7.34 | 16.99 | 7.2 | 13.33 | 13.22 |

**Supplemental Table 4**. Sepsis and DM related age-adjusted mortality rates per 100,000 among adults in the United States, 1999-2020.

| **Census Region** | **Year** | **Age Adjusted Rate** |
| --- | --- | --- |
| Northeast | 1999 | 9.1 |
| Northeast | 2000 | 8.99 |
| Northeast | 2001 | 9.43 |
| Northeast | 2002 | 8.98 |
| Northeast | 2003 | 8.73 |
| Northeast | 2004 | 8.8 |
| Northeast | 2005 | 9.2 |
| Northeast | 2006 | 8.63 |
| Northeast | 2007 | 8.24 |
| Northeast | 2008 | 7.61 |
| Northeast | 2009 | 6.85 |
| Northeast | 2010 | 6.99 |
| Northeast | 2011 | 7.04 |
| Northeast | 2012 | 6.6 |
| Northeast | 2013 | 6.81 |
| Northeast | 2014 | 6.74 |
| Northeast | 2015 | 6.74 |
| Northeast | 2016 | 6.52 |
| Northeast | 2017 | 6.27 |
| Northeast | 2018 | 6.14 |
| Northeast | 2019 | 6.08 |
| Northeast | 2020 | 7.78 |
| Northeast | Total | 7.55 |
| Midwest | 1999 | 7.92 |
| Midwest | 2000 | 7.72 |
| Midwest | 2001 | 7.63 |
| Midwest | 2002 | 7.72 |
| Midwest | 2003 | 8.17 |
| Midwest | 2004 | 8.08 |
| Midwest | 2005 | 8.29 |
| Midwest | 2006 | 7.77 |
| Midwest | 2007 | 7.73 |
| Midwest | 2008 | 7.39 |
| Midwest | 2009 | 7.19 |
| Midwest | 2010 | 6.79 |
| Midwest | 2011 | 7.06 |
| Midwest | 2012 | 6.49 |
| Midwest | 2013 | 6.56 |
| Midwest | 2014 | 6.64 |
| Midwest | 2015 | 6.8 |
| Midwest | 2016 | 6.65 |
| Midwest | 2017 | 6.65 |
| Midwest | 2018 | 6.8 |
| Midwest | 2019 | 6.7 |
| Midwest | 2020 | 9.21 |
| Midwest | Total | 7.31 |
| South | 1999 | 9.75 |
| South | 2000 | 9.66 |
| South | 2001 | 9.9 |
| South | 2002 | 10.2 |
| South | 2003 | 10.14 |
| South | 2004 | 9.94 |
| South | 2005 | 10.23 |
| South | 2006 | 9.53 |
| South | 2007 | 9.13 |
| South | 2008 | 9 |
| South | 2009 | 8.52 |
| South | 2010 | 8.35 |
| South | 2011 | 7.98 |
| South | 2012 | 7.8 |
| South | 2013 | 7.84 |
| South | 2014 | 7.75 |
| South | 2015 | 8.16 |
| South | 2016 | 8.65 |
| South | 2017 | 8.57 |
| South | 2018 | 8.81 |
| South | 2019 | 8.56 |
| South | 2020 | 12.13 |
| South | Total | 9.08 |
| West | 1999 | 8.14 |
| West | 2000 | 7.84 |
| West | 2001 | 7.98 |
| West | 2002 | 8.44 |
| West | 2003 | 8.66 |
| West | 2004 | 8.65 |
| West | 2005 | 9.13 |
| West | 2006 | 8.83 |
| West | 2007 | 8.63 |
| West | 2008 | 8.53 |
| West | 2009 | 8.12 |
| West | 2010 | 8.41 |
| West | 2011 | 8.53 |
| West | 2012 | 7.95 |
| West | 2013 | 8.04 |
| West | 2014 | 7.91 |
| West | 2015 | 8.45 |
| West | 2016 | 8.8 |
| West | 2017 | 9.07 |
| West | 2018 | 8.67 |
| West | 2019 | 8.47 |
| West | 2020 | 11.96 |
| West | Total | 8.63 |


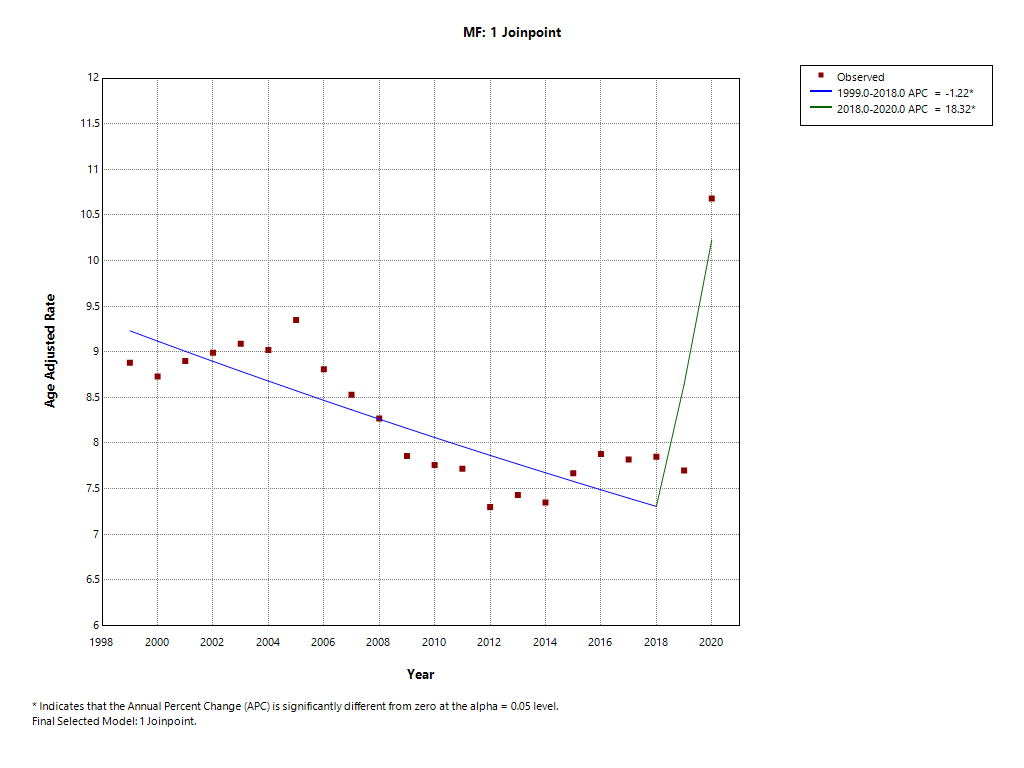


Supplemental Figure 1: Annual trends in overall sepsis and DM related mortality
